# Supplementary material
Source: PubMed Central journal article supplement (PMC5637620)
Supplement: tpmd170262.SD1.pdf [file tpmd170262.SD1.pdf]

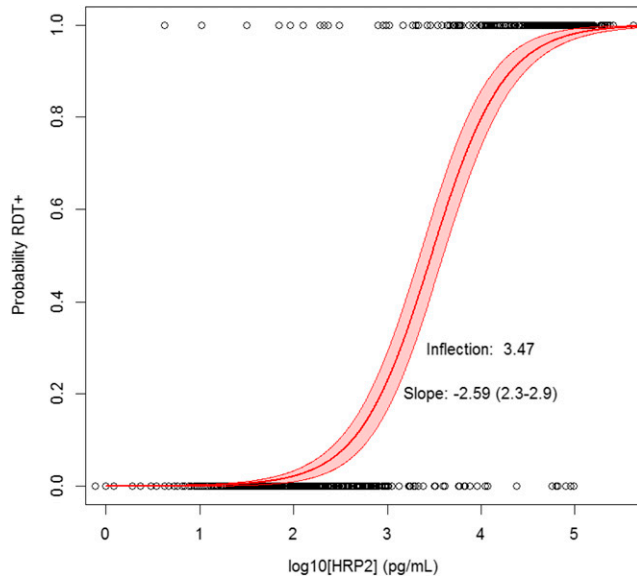

SUPPLEMENTAL FIGURE 1. The probability of an outpatient testing positive by a histidine-rich protein 2 (HRP2) rapid diagnostic test as a function of HRP2 concentration measured afterwards in the laboratory. A logistic curve was fit to the data, and the limit of detection was defined as the inflection point of the logistic curve. Data from patients of all ages and symptoms visiting outpatient clinics in Huambo and Uíge Provinces, Angola.
